# Supplementary material for: Composition of the Anuran Community in a Forest Management Area in Southeastern Amazonia
Source: MDPI journal article supplement (doi:10.3390/land12071437), 2023-07-19
Supplement: s1 [file s1]

# Supplementary material

**Table S1.** Table with the richness and abundance of anuran species at the Uberlândia farm, southeastern Amazon, Brazil, considering the UPA/Year of exploitation and the type of environment. APU: Annual production unit; ENV: Environment (YARD; Secondary road= ROAD, Skid trail= SKID, and Forest=FOR); RIC: Wealth; ABU: Abundance. Amer: *Amerega* sp.; Rhmarg: *Rhinella* gr. *margaritifera*; Prist: *Pristimantis giorgii*; Adegal: *Adelphobates galactonotus*; Phys: *Physalaemus* sp.; Lepent: *Leptodactylus pentadactylus*; Lepmys: *Leptodactylus mystaceus*; Adeno: *Adenomera* sp.; Rhmari: *R. marina*; Scneb: *Scinax nebulosus*; Phyvail: *Phyllomedusa vaillantii*; Phylo sp: *Phyllomedusa* sp.; Pithyp: *Pithecopus hypochondrialis*; Denmela: *Dendropsophus melanargyreus*; Denmin: *D. minutus*; Denmicr: *D. gr. microcephalus*; Dendro. sp: *Dendropsophus* sp.; Boageo: *Boana geographica*; Rhigran: *Rhinela granulosa*.

| UPA  | ENV      | RIC | ABU | Amer | Rhmarg | Prist | Adegal | Phys | Lepent | Lepmys | Adeno | Rhmari | Scneb | Phyvail | Phylo sp | Pithyp | Denmela | Denmin | Denmicr | Dendro. sp | Boageo | Rhigran |
|------|----------|-----|-----|------|--------|-------|--------|------|--------|--------|-------|--------|-------|---------|----------|--------|---------|--------|---------|------------|--------|---------|
| 2002 | SKI<br>D | 2   | 5   | 0    | 0      | 0     | 0      | 4    | 0      | 1      | 0     | 0      | 0     | 0       | 0        | 0      | 0       | 0      | 0       | 0          | 0      | 0       |
| 2002 | SKI<br>D | 3   | 8   | 0    | 0      | 0     | 0      | 3    | 0      | 3      | 2     | 0      | 0     | 0       | 0        | 0      | 0       | 0      | 0       | 0          | 0      | 0       |
| 2002 | FO<br>R  | 4   | 14  | 4    | 5      | 0     | 0      | 0    | 0      | 4      | 1     | 0      | 0     | 0       | 0        | 0      | 0       | 0      | 0       | 0          | 0      | 0       |
| 2002 | YA<br>RD | 5   | 31  | 6    | 9      | 0     | 0      | 0    | 1      | 10     | 5     | 0      | 0     | 0       | 0        | 0      | 0       | 0      | 0       | 0          | 0      | 0       |
| 2015 | RO<br>AD | 4   | 24  | 0    | 6      | 0     | 1      | 0    | 0      | 8      | 9     | 0      | 0     | 0       | 0        | 0      | 0       | 0      | 0       | 0          | 0      | 0       |
| 2015 | SKI<br>D | 4   | 19  | 0    | 5      | 6     | 0      | 0    | 0      | 3      | 5     | 0      | 0     | 0       | 0        | 0      | 0       | 0      | 0       | 0          | 0      | 0       |
| 2015 | FO<br>R  | 5   | 23  | 7    | 5      | 1     | 0      | 0    | 0      | 9      | 1     | 0      | 0     | 0       | 0        | 0      | 0       | 0      | 0       | 0          | 0      | 0       |
| 2015 | YA<br>RD | 6   | 45  | 0    | 7      | 0     | 0      | 0    | 0      | 2      | 0     | 10     | 0     | 2       | 0        | 8      | 0       | 0      | 12      | 4          | 0      | 0       |
| 2016 | RO<br>AD | 3   | 5   | 2    | 0      | 0     | 0      | 0    | 0      | 2      | 1     | 0      | 0     | 0       | 0        | 0      | 0       | 0      | 0       | 0          | 0      | 0       |
| 2016 | SKI<br>D | 5   | 10  | 1    | 1      | 0     | 0      | 2    | 0      | 3      | 0     | 3      | 0     | 0       | 0        | 0      | 0       | 0      | 0       | 0          | 0      | 0       |
| 2016 | FO<br>R  | 6   | 25  | 1    | 6      | 3     | 0      | 2    | 0      | 7      | 6     | 0      | 0     | 0       | 0        | 0      | 0       | 0      | 0       | 0          | 0      | 0       |
| 2016 | YA<br>RD | 11  | 80  | 1    | 1      | 0     | 0      | 3    | 0      | 0      | 2     | 7      | 0     | 2       | 0        | 8      | 3       | 36     | 13      | 4          | 0      | 0       |
| 2017 | RO<br>AD | 6   | 99  | 4    | 3      | 7     | 0      | 2    | 0      | 8      | 0     | 0      | 0     | 0       | 0        | 0      | 0       | 0      | 0       | 0          | 0      | 75      |
| 2017 | SKI<br>D | 2   | 2   | 0    | 1      | 0     | 0      | 0    | 0      | 0      | 1     | 0      | 0     | 0       | 0        | 0      | 0       | 0      | 0       | 0          | 0      | 0       |
| 2017 | FO<br>R  | 3   | 16  | 0    | 3      | 5     | 0      | 0    | 0      | 8      | 0     | 0      | 0     | 0       | 0        | 0      | 0       | 0      | 0       | 0          | 0      | 0       |
| 2017 | YA<br>RD | 3   | 15  | 0    | 5      | 0     | 0      | 8    | 0      | 2      | 0     | 0      | 0     | 0       | 0        | 0      | 0       | 0      | 0       | 0          | 0      | 0       |
| 2018 | RO<br>AD | 11  | 57  | 1    | 5      | 0     | 0      | 3    | 1      | 11     | 1     | 0      | 3     | 0       | 0        | 0      | 0       | 16     | 0       | 14         | 1      | 1       |
| 2018 | SKI<br>D | 3   | 14  | 0    | 0      | 9     | 0      | 0    | 0      | 2      | 3     | 0      | 0     | 0       | 0        | 0      | 0       | 0      | 0       | 0          | 0      | 0       |

|      |          |   |    |   |    |   |   |   |   |    |   |   |   |   |   |   |   |   |   |   |   |
|------|----------|---|----|---|----|---|---|---|---|----|---|---|---|---|---|---|---|---|---|---|---|
| 2018 | FO<br>R  | 6 | 23 | 3 | 7  | 2 | 0 | 0 | 0 | 5  | 5 | 1 | 0 | 0 | 0 | 0 | 0 | 0 | 0 | 0 | 0 |
| 2018 | YA<br>RD | 6 | 23 | 0 | 8  | 2 | 0 | 1 | 0 | 3  | 0 | 5 | 0 | 0 | 0 | 0 | 0 | 0 | 4 | 0 | 0 |
| 2019 | RO<br>AD | 7 | 30 | 2 | 9  | 3 | 0 | 6 | 0 | 3  | 3 | 4 | 0 | 0 | 0 | 0 | 0 | 0 | 0 | 0 | 0 |
| 2019 | SKI<br>D | 5 | 17 | 0 | 1  | 7 | 0 | 2 | 0 | 6  | 1 | 0 | 0 | 0 | 0 | 0 | 0 | 0 | 0 | 0 | 0 |
| 2019 | FO<br>R  | 5 | 34 | 3 | 8  | 3 | 0 | 0 | 0 | 15 | 5 | 0 | 0 | 0 | 0 | 0 | 0 | 0 | 0 | 0 | 0 |
| 2019 | YA<br>RD | 3 | 14 | 0 | 1  | 0 | 0 | 7 | 0 | 0  | 0 | 6 | 0 | 0 | 0 | 0 | 0 | 0 | 0 | 0 | 0 |
| 2020 | RO<br>AD | 8 | 13 | 0 | 2  | 1 | 0 | 3 | 0 | 0  | 2 | 0 | 0 | 1 | 1 | 2 | 0 | 0 | 0 | 0 | 1 |
| 2020 | SKI<br>D | 4 | 19 | 0 | 5  | 6 | 0 | 0 | 0 | 7  | 1 | 0 | 0 | 0 | 0 | 0 | 0 | 0 | 0 | 0 | 0 |
| 2020 | FO<br>R  | 4 | 33 | 3 | 12 | 0 | 0 | 0 | 0 | 15 | 3 | 0 | 0 | 0 | 0 | 0 | 0 | 0 | 0 | 0 | 0 |
| 2020 | YA<br>RD | 5 | 12 | 0 | 0  | 1 | 0 | 0 | 0 | 3  | 0 | 5 | 0 | 0 | 0 | 0 | 2 | 0 | 0 | 1 | 0 |
